# Supplementary material for: Dietary Fibre Impacts the Texture of Cooked Whole Grain Rice
Source: MDPI journal article supplement (doi:10.3390/foods12040899), 2023-02-20
Supplement: s1 [file s1]

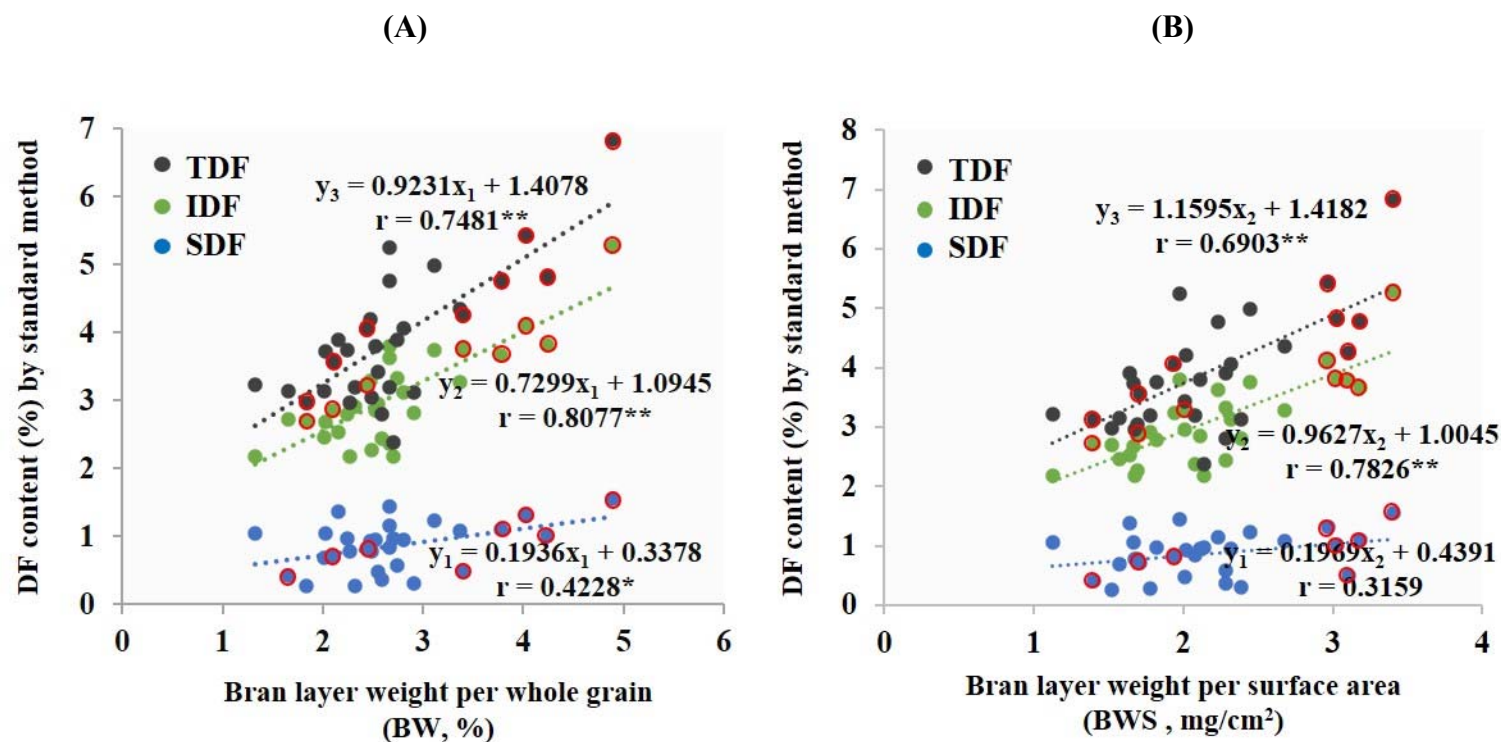

**Figure S1.** Linear regression between the percentage of dietary fibre content: SDF, IDF and, TDF, and (A) the percentage of bran layer weight without germ in whole grain rice (BW, g/100 g) determined by the alkaline method or (B) the bran layer weight without germ per surface area (BWS, mg/cm<sup>2</sup>). Rice varieties with ASV equal to exactly 1 are shown as circles with red border.  
 \* Correlation is significant at the 0.05 level; \*\* Correlation is significant at the 0.01 level.

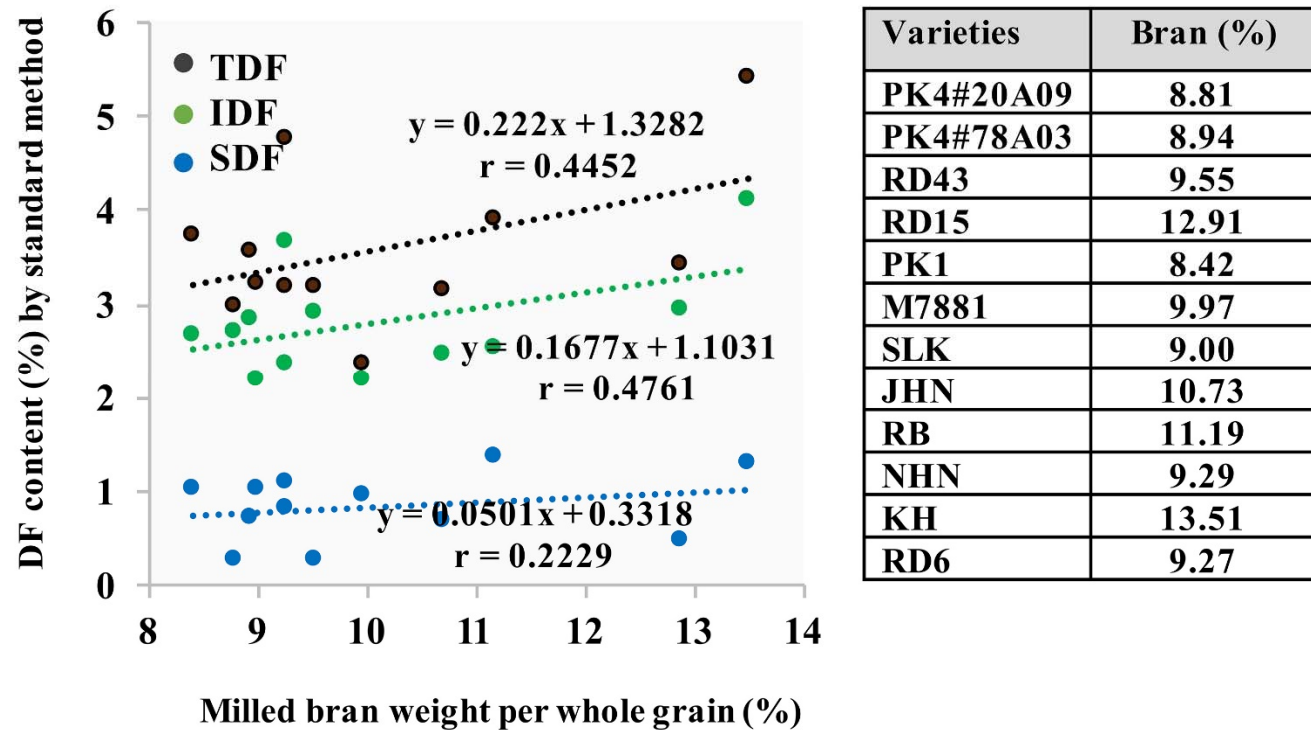

**Figure S2.** Linear regression between the percentage of dietary fibre content: SDF, IDF and, TDF, and the percentage of the rice bran weight determined by the milling method.
