# Supplementary material for: Dietary Fibre Impacts the Texture of Cooked Whole Grain Rice
Source: MDPI journal article supplement (doi:10.3390/foods12040899), 2023-02-20
Supplement: s1 [file s1]

**Table S1.** Rice bran traits of whole grain rice samples.

| Varieties  | Bran layer without germ    |                             |                            | Bran layer with germ       |                             |                            |
|------------|----------------------------|-----------------------------|----------------------------|----------------------------|-----------------------------|----------------------------|
|            | BW                         | BWG                         | BWS                        | BW                         | BWG                         | BWS                        |
|            | (g/100 g)                  | (mg/g)                      | (mg/cm <sup>2</sup> )      | (g/100 g)                  | (mg/g)                      | (mg/cm <sup>2</sup> )      |
| 66B09      | 2.75 ± 0.12 <sup>g-j</sup> | 27.45 ± 1.23 <sup>g-j</sup> | 2.28 ± 0.10 <sup>h-j</sup> | 5.97 ± 0.25 <sup>j-l</sup> | 59.67 ± 2.47 <sup>j-l</sup> | 4.96 ± 0.21 <sup>j-l</sup> |
| PK4#20A09  | 1.84 ± 0.06 <sup>a-c</sup> | 18.44 ± 0.65 <sup>a-c</sup> | 1.52 ± 0.05 <sup>a-c</sup> | 4.96 ± 0.12 <sup>d-g</sup> | 49.59 ± 1.15 <sup>d-g</sup> | 4.09 ± 0.09 <sup>e-h</sup> |
| 16F35      | 2.58 ± 0.08 <sup>e-j</sup> | 25.85 ± 0.79 <sup>e-j</sup> | 2.28 ± 0.07 <sup>h-j</sup> | 5.20 ± 0.23 <sup>f-h</sup> | 51.95 ± 2.34 <sup>f-h</sup> | 4.59 ± 0.21 <sup>h-k</sup> |
| MU2-00005  | 2.43 ± 0.04 <sup>d-i</sup> | 24.34 ± 0.36 <sup>d-i</sup> | 1.94 ± 0.03 <sup>c-h</sup> | 4.36 ± 0.22 <sup>b-d</sup> | 43.57 ± 2.20 <sup>b-d</sup> | 3.48 ± 0.18 <sup>a-d</sup> |
| PK4#117A08 | 2.91 ± 0.12 <sup>i-k</sup> | 29.06 ± 1.20 <sup>i-k</sup> | 2.38 ± 0.10 <sup>i-j</sup> | 5.01 ± 0.05 <sup>e-g</sup> | 50.13 ± 0.62 <sup>e-g</sup> | 4.11 ± 0.05 <sup>e-h</sup> |
| PK4#78A03  | 2.10 ± 0.10 <sup>c-f</sup> | 21.03 ± 1.02 <sup>c-f</sup> | 1.71 ± 0.08 <sup>b-f</sup> | 5.46 ± 0.10 <sup>g-j</sup> | 54.60 ± 1.05 <sup>g-j</sup> | 4.44 ± 0.09 <sup>g-j</sup> |
| DGR        | 2.27 ± 0.10 <sup>c-f</sup> | 22.69 ± 1.01 <sup>c-f</sup> | 1.68 ± 0.07 <sup>b-d</sup> | 4.44 ± 0.83 <sup>b-e</sup> | 44.44 ± 8.39 <sup>b-e</sup> | 3.28 ± 0.62 <sup>a-c</sup> |
| M9997      | 2.24 ± 0.13 <sup>c-g</sup> | 22.38 ± 1.25 <sup>c-g</sup> | 1.82 ± 0.10 <sup>b-g</sup> | 4.74 ± 0.29 <sup>c-f</sup> | 47.41 ± 2.86 <sup>c-f</sup> | 3.86 ± 0.23 <sup>d-f</sup> |
| BMT        | 2.48 ± 0.07 <sup>d-i</sup> | 24.83 ± 0.74 <sup>d-i</sup> | 1.69 ± 0.05 <sup>b-f</sup> | 5.29 ± 0.08 <sup>f-i</sup> | 52.87 ± 0.75 <sup>f-i</sup> | 3.61 ± 0.05 <sup>b-e</sup> |
| KTH        | 3.39 ± 0.31 <sup>o</sup>   | 33.89 ± 3.10 <sup>o</sup>   | 3.11 ± 0.28 <sup>l,m</sup> | 5.65 ± 0.35 <sup>a</sup>   | 56.52 ± 3.48 <sup>a</sup>   | 5.18 ± 0.32 <sup>l,m</sup> |
| RD43       | 2.32 ± 0.04 <sup>c-h</sup> | 23.16 ± 0.35 <sup>c-h</sup> | 1.78 ± 0.03 <sup>b-f</sup> | 5.79 ± 0.08 <sup>i-k</sup> | 57.85 ± 0.80 <sup>i-k</sup> | 4.45 ± 0.06 <sup>g-i</sup> |
| RD15       | 2.55 ± 0.06 <sup>d-j</sup> | 25.45 ± 0.55 <sup>d-j</sup> | 2.01 ± 0.04 <sup>d-i</sup> | 5.75 ± 0.21 <sup>h-k</sup> | 57.50 ± 2.08 <sup>h-k</sup> | 4.55 ± 0.16 <sup>g-k</sup> |
| PNL80      | 2.81 ± 0.15 <sup>h-j</sup> | 28.12 ± 1.46 <sup>h-j</sup> | 2.31 ± 0.12 <sup>h-j</sup> | 5.51 ± 0.23 <sup>g-k</sup> | 55.12 ± 2.34 <sup>g-k</sup> | 4.54 ± 0.19 <sup>g-k</sup> |
| PK1        | 2.02 ± 0.14 <sup>b-d</sup> | 20.23 ± 1.37 <sup>b-d</sup> | 1.67 ± 0.11 <sup>b-e</sup> | 4.99 ± 0.14 <sup>e-g</sup> | 49.85 ± 1.37 <sup>e-g</sup> | 4.12 ± 0.11 <sup>e-h</sup> |
| KDML105    | 2.53 ± 0.49 <sup>d-i</sup> | 25.29 ± 4.88 <sup>d-i</sup> | 2.11 ± 0.41 <sup>f-i</sup> | 5.33 ± 0.39 <sup>g-i</sup> | 53.27 ± 3.90 <sup>g-i</sup> | 4.45 ± 0.33 <sup>g-j</sup> |
| HS         | 3.37 ± 0.04 <sup>k,l</sup> | 33.67 ± 0.43 <sup>k,l</sup> | 2.68 ± 0.03 <sup>j,k</sup> | 5.04 ± 0.15 <sup>e-g</sup> | 50.38 ± 1.49 <sup>e-g</sup> | 4.01 ± 0.12 <sup>d-g</sup> |
| PTN1       | 2.48 ± 0.12 <sup>d-i</sup> | 24.80 ± 1.22 <sup>d-i</sup> | 2.02 ± 0.10 <sup>d-i</sup> | 5.22 ± 0.06 <sup>f-i</sup> | 52.21 ± 0.61 <sup>f-i</sup> | 4.26 ± 0.05 <sup>f-h</sup> |
| M7881      | 2.71 ± 0.35 <sup>f-j</sup> | 27.13 ± 3.50 <sup>f-j</sup> | 2.14 ± 0.28 <sup>e-i</sup> | 6.41 ± 0.25 <sup>l</sup>   | 64.13 ± 2.46 <sup>l</sup>   | 5.06 ± 0.19 <sup>k,l</sup> |
| MU2-42     | 2.67 ± 0.19 <sup>e-j</sup> | 26.66 ± 1.95 <sup>e-j</sup> | 1.98 ± 0.14 <sup>c-i</sup> | 6.14 ± 0.10 <sup>k,l</sup> | 61.42 ± 1.02 <sup>k,l</sup> | 4.55 ± 0.08 <sup>b-j</sup> |
| SL         | 1.33 ± 0.04 <sup>a</sup>   | 13.30 ± 0.40 <sup>a</sup>   | 1.12 ± 0.03 <sup>a</sup>   | 3.74 ± 0.04 <sup>a</sup>   | 37.39 ± 0.32 <sup>a</sup>   | 3.16 ± 0.03 <sup>a,b</sup> |
| 909-10-3   | 2.67 ± 0.14 <sup>f-j</sup> | 26.67 ± 1.39 <sup>f-j</sup> | 2.24 ± 0.12 <sup>g-i</sup> | 4.24 ± 0.22 <sup>a-c</sup> | 42.36 ± 2.25 <sup>a-c</sup> | 3.55 ± 0.19 <sup>a-e</sup> |
| JHN        | 2.02 ± 0.09 <sup>b-e</sup> | 20.17 ± 0.93 <sup>b-e</sup> | 1.83 ± 0.08 <sup>b-h</sup> | 4.52 ± 0.04 <sup>b-e</sup> | 45.24 ± 0.42 <sup>b-e</sup> | 3.52 ± 0.03 <sup>a-d</sup> |
| HCS        | 1.66 ± 0.01 <sup>a,b</sup> | 16.59 ± 0.09 <sup>a,b</sup> | 1.40 ± 0.01 <sup>a,b</sup> | 4.01 ± 0.12 <sup>a,b</sup> | 40.05 ± 1.02 <sup>a,b</sup> | 3.38 ± 0.09 <sup>a-c</sup> |
| HLN        | 3.11 ± 0.09 <sup>j,k</sup> | 31.12 ± 0.87 <sup>j,k</sup> | 2.45 ± 0.07 <sup>i,j</sup> | 6.10 ± 0.11 <sup>k,l</sup> | 60.97 ± 1.14 <sup>k,l</sup> | 4.80 ± 0.09 <sup>j-l</sup> |
| RB         | 2.15 ± 0.05 <sup>b-f</sup> | 21.55 ± 0.49 <sup>b-f</sup> | 1.64 ± 0.04 <sup>b-d</sup> | 4.02 ± 0.07 <sup>a,b</sup> | 40.23 ± 0.71 <sup>a,b</sup> | 3.06 ± 0.05 <sup>a</sup>   |
| SYN        | 4.24 ± 0.16 <sup>m</sup>   | 42.35 ± 1.57 <sup>m</sup>   | 3.03 ± 0.11 <sup>k-m</sup> | 5.25 ± 0.03 <sup>f-i</sup> | 52.48 ± 0.29 <sup>f-i</sup> | 3.76 ± 0.02 <sup>c-f</sup> |
| NHN        | 3.78 ± 0.41 <sup>l-m</sup> | 37.83 ± 4.10 <sup>l-m</sup> | 3.19 ± 0.35 <sup>l,m</sup> | 6.11 ± 0.43 <sup>k,l</sup> | 61.10 ± 4.29 <sup>k,l</sup> | 5.14 ± 0.36 <sup>l,m</sup> |
| KH         | 4.03 ± 0.12 <sup>m</sup>   | 40.32 ± 1.18 <sup>m</sup>   | 2.97 ± 0.09 <sup>k,l</sup> | 7.69 ± 0.29 <sup>f-i</sup> | 76.93 ± 2.87 <sup>f-i</sup> | 5.66 ± 0.21 <sup>l</sup>   |
| MU1-2313   | 4.89 ± 0.29 <sup>n</sup>   | 48.86 ± 2.88 <sup>n</sup>   | 3.41 ± 0.20 <sup>m</sup>   | 10.43 ± 0.05 <sup>m</sup>  | 104.30 ± 0.53 <sup>m</sup>  | 7.28 ± 0.04 <sup>m</sup>   |
| RD6        | 2.67 ± 0.33 <sup>f-j</sup> | 26.72 ± 3.33 <sup>f-j</sup> | 2.08 ± 0.26 <sup>e-i</sup> | 6.16 ± 0.49 <sup>k,l</sup> | 61.61 ± 4.88 <sup>k,l</sup> | 4.79 ± 0.38 <sup>i-l</sup> |

Results are the means ± SE on dry basis. Values with different letters in the same column are significantly different with  $P < 0.05$ . The weight of bran layer without germ or with germ, determined by alkaline method are presented as bran layer weight/whole grain rice: BW, g/100 g and BWG, mg/g, and presented as bran layer weight/unit of surface area: BWS, mg/cm<sup>2</sup>.

**Table S2.** Physical characteristics of whole grain rice samples.

| Varieties  | <sup>a</sup> Alkaline | <sup>b</sup> Shape         |                            |                            |                            | <sup>c</sup> FKW (g)         | <sup>d</sup> Surface area    |                               |
|------------|-----------------------|----------------------------|----------------------------|----------------------------|----------------------------|------------------------------|------------------------------|-------------------------------|
|            | test                  | L (cm)                     | W (cm)                     | T (cm)                     | L : W                      |                              | s (cm <sup>2</sup> /kernel)  | S (cm <sup>2</sup> /g)        |
| 66B09      | 2.40                  | 0.75 ± 0.01 <sup>j-l</sup> | 0.22 ± 0.00 <sup>o-q</sup> | 0.17 ± 0.00 <sup>h-j</sup> | 3.45 ± 0.04 <sup>d,e</sup> | 1.067 ± 0.004 <sup>k-m</sup> | 0.257 ± 0.007 <sup>j</sup>   | 12.03 ± 0.31 <sup>b-d,f</sup> |
| PK4#20A09  | 4.50                  | 0.71 ± 0.02 <sup>e-h</sup> | 0.23 ± 0.01 <sup>r</sup>   | 0.18 ± 0.00 <sup>k,l</sup> | 3.07 ± 0.12 <sup>a</sup>   | 1.090 ± 0.006 <sup>l,m</sup> | 0.265 ± 0.007 <sup>j</sup>   | 12.13 ± 0.31 <sup>b-f</sup>   |
| 16F35      | 1.70                  | 0.75 ± 0.01 <sup>j-l</sup> | 0.22 ± 0.00 <sup>p,q</sup> | 0.17 ± 0.00 <sup>g-i</sup> | 3.46 ± 0.07 <sup>d,e</sup> | 1.127 ± 0.005 <sup>m</sup>   | 0.255 ± 0.006 <sup>j</sup>   | 11.32 ± 0.25 <sup>a,b</sup>   |
| MU2-00005  | 1.00                  | 0.74 ± 0.01 <sup>h-k</sup> | 0.19 ± 0.00 <sup>c-e</sup> | 0.16 ± 0.00 <sup>c,d</sup> | 3.87 ± 0.07 <sup>j-m</sup> | 0.901 ± 0.012 <sup>e-h</sup> | 0.226 ± 0.002 <sup>f,g</sup> | 12.52 ± 0.10 <sup>d-j</sup>   |
| PK4#117A08 | 3.40                  | 0.76 ± 0.01 <sup>l,m</sup> | 0.21 ± 0.00 <sup>k-p</sup> | 0.17 ± 0.00 <sup>j,k</sup> | 3.65 ± 0.04 <sup>f,i</sup> | 1.068 ± 0.006 <sup>k-m</sup> | 0.260 ± 0.002 <sup>j</sup>   | 12.19 ± 0.11 <sup>c-g</sup>   |
| PK4#78A03  | 1.00                  | 0.74 ± 0.02 <sup>h-l</sup> | 0.20 ± 0.00 <sup>d-l</sup> | 0.16 ± 0.00 <sup>e-i</sup> | 3.71 ± 0.08 <sup>g-k</sup> | 0.978 ± 0.004 <sup>d,f</sup> | 0.241 ± 0.005 <sup>g-i</sup> | 12.30 ± 0.28 <sup>c-i</sup>   |
| DGR        | 1.25                  | 0.70 ± 0.00 <sup>d-g</sup> | 0.20 ± 0.01 <sup>f,m</sup> | 0.17 ± 0.00 <sup>i-k</sup> | 3.50 ± 0.11 <sup>d-g</sup> | 0.877 ± 0.005 <sup>c-h</sup> | 0.238 ± 0.005 <sup>f-h</sup> | 13.54 ± 0.29 <sup>j-l</sup>   |
| M9997      | 1.40                  | 0.73 ± 0.01 <sup>g-j</sup> | 0.21 ± 0.00 <sup>k-p</sup> | 0.17 ± 0.00 <sup>g-i</sup> | 3.48 ± 0.08 <sup>d,f</sup> | 0.992 ± 0.003 <sup>h-k</sup> | 0.244 ± 0.006 <sup>h,i</sup> | 12.30 ± 0.28 <sup>c-h</sup>   |
| BMT        | 1.63                  | 0.75 ± 0.02 <sup>i-l</sup> | 0.18 ± 0.00 <sup>b</sup>   | 0.15 ± 0.00 <sup>b-d</sup> | 4.20 ± 0.12 <sup>o</sup>   | 0.750 ± 0.005 <sup>b,c</sup> | 0.219 ± 0.008 <sup>c-f</sup> | 14.66 ± 0.51 <sup>n</sup>     |
| KTH        | 1.00                  | 0.68 ± 0.01 <sup>b-d</sup> | 0.21 ± 0.00 <sup>m-p</sup> | 0.16 ± 0.00 <sup>f,i</sup> | 3.23 ± 0.07 <sup>a-c</sup> | 1.057 ± 0.007 <sup>j-m</sup> | 0.230 ± 0.007 <sup>f,g</sup> | 10.90 ± 0.33 <sup>a</sup>     |
| RD43       | 2.75                  | 0.75 ± 0.01 <sup>k-m</sup> | 0.20 ± 0.00 <sup>h-o</sup> | 0.17 ± 0.00 <sup>j,k</sup> | 3.77 ± 0.05 <sup>g-k</sup> | 0.994 ± 0.002 <sup>h-l</sup> | 0.259 ± 0.006 <sup>i,j</sup> | 13.01 ± 0.30 <sup>g-k</sup>   |
| RD15       | 2.75                  | 0.75 ± 0.02 <sup>i-l</sup> | 0.20 ± 0.01 <sup>c-j</sup> | 0.16 ± 0.01 <sup>c-f</sup> | 3.78 ± 0.08 <sup>h-l</sup> | 0.925 ± 0.003 <sup>e-i</sup> | 0.234 ± 0.004 <sup>f-h</sup> | 12.64 ± 0.20 <sup>d-k</sup>   |
| PNL80      | 4.10                  | 0.71 ± 0.01 <sup>e-g</sup> | 0.20 ± 0.00 <sup>g-k</sup> | 0.16 ± 0.00 <sup>c-e</sup> | 3.53 ± 0.05 <sup>d-g</sup> | 0.929 ± 0.005 <sup>f,i</sup> | 0.226 ± 0.004 <sup>f,g</sup> | 12.15 ± 0.24 <sup>c-h</sup>   |
| PK1        | 3.75                  | 0.76 ± 0.04 <sup>k-m</sup> | 0.21 ± 0.01 <sup>j-p</sup> | 0.17 ± 0.01 <sup>h-k</sup> | 3.65 ± 0.11 <sup>e-j</sup> | 1.070 ± 0.005 <sup>k-m</sup> | 0.259 ± 0.010 <sup>j</sup>   | 12.11 ± 0.45 <sup>b-h</sup>   |
| KDML105    | 2.63                  | 0.75 ± 0.03 <sup>i-l</sup> | 0.20 ± 0.01 <sup>g-n</sup> | 0.16 ± 0.01 <sup>e-i</sup> | 3.66 ± 0.09 <sup>e-j</sup> | 1.022 ± 0.008 <sup>i-m</sup> | 0.244 ± 0.005 <sup>h-j</sup> | 11.96 ± 0.24 <sup>b-f</sup>   |
| HS         | 1.20                  | 0.72 ± 0.01 <sup>f-i</sup> | 0.20 ± 0.00 <sup>c-h</sup> | 0.15 ± 0.00 <sup>b,c</sup> | 3.68 ± 0.05 <sup>g-i</sup> | 0.879 ± 0.006 <sup>d-g</sup> | 0.221 ± 0.004 <sup>d,f</sup> | 12.57 ± 0.23 <sup>e,g,j</sup> |
| PTN1       | 2.30                  | 0.71 ± 0.01 <sup>e-h</sup> | 0.20 ± 0.00 <sup>e-i</sup> | 0.15 ± 0.00 <sup>c</sup>   | 3.58 ± 0.05 <sup>e-i</sup> | 0.908 ± 0.004 <sup>e-i</sup> | 0.223 ± 0.003 <sup>d,f</sup> | 12.26 ± 0.19 <sup>c-i</sup>   |
| M7881      | 2.00                  | 0.79 ± 0.03 <sup>m</sup>   | 0.19 ± 0.01 <sup>c-g</sup> | 0.16 ± 0.01 <sup>c-g</sup> | 4.10 ± 0.10 <sup>n,o</sup> | 0.956 ± 0.005 <sup>f,k</sup> | 0.242 ± 0.009 <sup>h-j</sup> | 12.67 ± 0.49 <sup>e,g,k</sup> |
| MU2-42     | 1.50                  | 0.67 ± 0.01 <sup>b,c</sup> | 0.19 ± 0.00 <sup>c</sup>   | 0.15 ± 0.00 <sup>b</sup>   | 3.56 ± 0.05 <sup>e-h</sup> | 0.742 ± 0.004 <sup>b</sup>   | 0.200 ± 0.004 <sup>b</sup>   | 13.49 ± 0.27 <sup>k,l</sup>   |
| SL         | 1.75                  | 0.69 ± 0.01 <sup>b-f</sup> | 0.20 ± 0.01 <sup>f-m</sup> | 0.17 ± 0.01 <sup>h-j</sup> | 3.44 ± 0.09 <sup>c-f</sup> | 0.978 ± 0.005 <sup>h-k</sup> | 0.231 ± 0.003 <sup>e-h</sup> | 11.83 ± 0.15 <sup>b,c</sup>   |
| 909-10-3   | 1.60                  | 0.67 ± 0.00 <sup>b</sup>   | 0.20 ± 0.00 <sup>d-i</sup> | 0.15 ± 0.00 <sup>b,c</sup> | 3.37 ± 0.05 <sup>b-d</sup> | 0.872 ± 0.003 <sup>d-g</sup> | 0.208 ± 0.004 <sup>b,c</sup> | 11.92 ± 0.20 <sup>b,c</sup>   |
| JHN        | 2.00                  | 0.67 ± 0.01 <sup>b-e</sup> | 0.19 ± 0.00 <sup>b-d</sup> | 0.16 ± 0.00 <sup>c-f</sup> | 3.61 ± 0.11 <sup>e-i</sup> | 0.818 ± 0.001 <sup>b-g</sup> | 0.210 ± 0.005 <sup>b-d</sup> | 12.85 ± 0.28 <sup>e-k</sup>   |
| HCS        | 1.00                  | 0.73 ± 0.04 <sup>g-l</sup> | 0.19 ± 0.01 <sup>c-h</sup> | 0.16 ± 0.00 <sup>d-h</sup> | 3.80 ± 0.16 <sup>i-m</sup> | 0.980 ± 0.006 <sup>h-j</sup> | 0.233 ± 0.007 <sup>f-h</sup> | 11.86 ± 0.34 <sup>b-d</sup>   |
| HLN        | 1.60                  | 0.67 ± 0.01 <sup>b</sup>   | 0.19 ± 0.00 <sup>c-f</sup> | 0.15 ± 0.00 <sup>b,c</sup> | 3.50 ± 0.06 <sup>d-g</sup> | 0.805 ± 0.001 <sup>b-d</sup> | 0.205 ± 0.004 <sup>b</sup>   | 12.71 ± 0.25 <sup>e,g,j</sup> |
| RB         | 2.00                  | 0.68 ± 0.01 <sup>b-d</sup> | 0.18 ± 0.00 <sup>b-d</sup> | 0.15 ± 0.00 <sup>b,c</sup> | 3.89 ± 0.14 <sup>d-i</sup> | 0.771 ± 0.001 <sup>b-e</sup> | 0.203 ± 0.005 <sup>b</sup>   | 13.14 ± 0.29 <sup>i-l</sup>   |
| SYN        | 1.00                  | 0.62 ± 0.01 <sup>a</sup>   | 0.16 ± 0.00 <sup>a</sup>   | 0.14 ± 0.00 <sup>a</sup>   | 3.90 ± 0.08 <sup>k-n</sup> | 0.582 ± 0.002 <sup>a</sup>   | 0.163 ± 0.002 <sup>a</sup>   | 13.97 ± 0.13 <sup>l,m</sup>   |
| NHN        | 1.00                  | 0.90 ± 0.01 <sup>o</sup>   | 0.22 ± 0.01 <sup>n-q</sup> | 0.19 ± 0.01 <sup>l</sup>   | 4.12 ± 0.02 <sup>m-o</sup> | 1.313 ± 0.007 <sup>n</sup>   | 0.312 ± 0.010 <sup>l</sup>   | 11.88 ± 0.36 <sup>b-f</sup>   |
| KH         | 1.00                  | 0.84 ± 0.01 <sup>n</sup>   | 0.21 ± 0.00 <sup>i-p</sup> | 0.18 ± 0.01 <sup>j,k</sup> | 4.02 ± 0.06 <sup>l-o</sup> | 1.046 ± 0.011 <sup>j-m</sup> | 0.284 ± 0.010 <sup>k</sup>   | 13.58 ± 0.49 <sup>k,l</sup>   |
| MU1-2313   | 1.00                  | 0.70 ± 0.01 <sup>c-f</sup> | 0.20 ± 0.00 <sup>c-h</sup> | 0.15 ± 0.01 <sup>b</sup>   | 3.55 ± 0.03 <sup>d-g</sup> | 0.735 ± 0.006 <sup>b</sup>   | 0.211 ± 0.004 <sup>b-e</sup> | 14.33 ± 0.30 <sup>m,n</sup>   |
| RD6        | 4.00                  | 0.71 ± 0.01 <sup>e-h</sup> | 0.23 ± 0.00 <sup>q,r</sup> | 0.16 ± 0.00 <sup>c-g</sup> | 3.15 ± 0.11 <sup>a,b</sup> | 0.946 ± 0.008 <sup>g-i</sup> | 0.243 ± 0.003 <sup>h-j</sup> | 12.85 ± 0.15 <sup>h-k</sup>   |

Results are the means ± SE on dry basis. Values with different letters in the same column are significantly different with  $P < 0.05$ . <sup>a</sup>Alkaline spreading test, the spreading value was rated visually on a 7-point numerical scale: 1 = Intact, 7= Greatly dispersed. <sup>b</sup> Shape: L, length; W, width; T, thickness; L : W, length : width ratio. <sup>c</sup>FKW, 50 kernel weight. <sup>d</sup>Surface area; s, surface area/kernel where S, surface area/g whole grain rice.

**Table S3.** Chemical compositions of whole grain rice samples.

| Varieties  | Colour | Amylose                     | Starch                      | <sup>a</sup> Dietary fibre |                            |                              |                            |
|------------|--------|-----------------------------|-----------------------------|----------------------------|----------------------------|------------------------------|----------------------------|
|            |        |                             |                             | SDF                        | IDF                        | TDF                          | SDF:IDF                    |
| 66B09      | White  | 27.53 ± 0.05 <sup>a</sup>   | 81.92 ± 0.52 <sup>g,h</sup> | 0.57 ± 0.03 <sup>a-e</sup> | 3.33 ± 0.02 <sup>e-g</sup> | 3.90 ± 0.01 <sup>e-h</sup>   | 0.17 ± 0.01 <sup>a-e</sup> |
| PK4#20A09  | White  | 26.86 ± 0.04 <sup>b</sup>   | 84.29 ± 0.46 <sup>i,j</sup> | 0.27 ± 0.02 <sup>a</sup>   | 2.71 ± 0.38 <sup>a-e</sup> | 2.97 ± 0.40 <sup>a,b</sup>   | 0.10 ± 0.01 <sup>a</sup>   |
| 16F35      | White  | 26.77 ± 0.11 <sup>b</sup>   | 78.76 ± 0.15 <sup>c-e</sup> | 0.37 ± 0.05 <sup>a</sup>   | 2.44 ± 0.33 <sup>a-c</sup> | 2.80 ± 0.29 <sup>a</sup>     | 0.15 ± 0.04 <sup>a-d</sup> |
| MU2-00005  | White  | 26.73 ± 0.63 <sup>b</sup>   | 83.12 ± 0.41 <sup>h-j</sup> | 0.82 ± 0.21 <sup>e-h</sup> | 3.23 ± 0.12 <sup>e-g</sup> | 4.05 ± 0.09 <sup>f-i</sup>   | 0.25 ± 0.07 <sup>b-g</sup> |
| PK4#117A08 | White  | 26.69 ± 0.48 <sup>b</sup>   | 80.92 ± 0.35 <sup>f,g</sup> | 0.31 ± 0.01 <sup>a</sup>   | 2.82 ± 0.24 <sup>a-e</sup> | 3.13 ± 0.23 <sup>a-d</sup>   | 0.11 ± 0.01 <sup>a</sup>   |
| PK4#78A03  | White  | 25.74 ± 0.47 <sup>c</sup>   | 84.56 ± 0.77 <sup>i</sup>   | 0.71 ± 0.00 <sup>b,f</sup> | 2.86 ± 0.18 <sup>b-e</sup> | 3.57 ± 0.18 <sup>b-g</sup>   | 0.25 ± 0.02 <sup>b-f</sup> |
| DGR        | White  | 25.01 ± 0.21 <sup>d</sup>   | 83.51 ± 0.64 <sup>h-j</sup> | 0.78 ± 0.14 <sup>c-g</sup> | 2.18 ± 0.59 <sup>a</sup>   | 2.96 ± 0.73 <sup>a,b</sup>   | 0.36 ± 0.04 <sup>f,j</sup> |
| M9997      | White  | 23.91 ± 0.04 <sup>e</sup>   | 78.12 ± 0.43 <sup>b-e</sup> | 0.96 ± 0.01 <sup>f,j</sup> | 2.79 ± 0.16 <sup>a-e</sup> | 3.75 ± 0.16 <sup>c-h</sup>   | 0.34 ± 0.02 <sup>f,i</sup> |
| BMT        | White  | 22.48 ± 0.36 <sup>f</sup>   | 79.64 ± 0.46 <sup>e,f</sup> | 0.79 ± 0.11 <sup>d-g</sup> | 2.26 ± 0.18 <sup>a,b</sup> | 3.05 ± 0.07 <sup>a-c</sup>   | 0.35 ± 0.07 <sup>f,i</sup> |
| KTH        | White  | 21.73 ± 0.04 <sup>g</sup>   | 79.05 ± 0.12 <sup>d-f</sup> | 0.49 ± 0.04 <sup>a-d</sup> | 3.77 ± 0.07 <sup>f,h</sup> | 4.26 ± 0.03 <sup>g-k</sup>   | 0.13 ± 0.01 <sup>a,b</sup> |
| RD43       | White  | 19.98 ± 0.28 <sup>h</sup>   | 75.83 ± 0.83 <sup>a</sup>   | 0.27 ± 0.01 <sup>a</sup>   | 2.92 ± 0.02 <sup>c-e</sup> | 3.19 ± 0.03 <sup>a-e</sup>   | 0.09 ± 0.00 <sup>a</sup>   |
| RD15       | White  | 18.23 ± 0.06 <sup>i</sup>   | 84.26 ± 0.20 <sup>i,j</sup> | 0.48 ± 0.01 <sup>a-c</sup> | 2.95 ± 0.21 <sup>c-e</sup> | 3.43 ± 0.21 <sup>a-f</sup>   | 0.16 ± 0.01 <sup>a-e</sup> |
| PNL80      | White  | 17.84 ± 0.00 <sup>i,j</sup> | 76.42 ± 0.79 <sup>a,b</sup> | 0.94 ± 0.06 <sup>f,j</sup> | 3.13 ± 0.47 <sup>d-f</sup> | 4.07 ± 0.53 <sup>f,j</sup>   | 0.31 ± 0.03 <sup>f,h</sup> |
| PK1        | White  | 17.66 ± 0.21 <sup>i,j</sup> | 82.85 ± 0.16 <sup>h-j</sup> | 1.05 ± 0.01 <sup>g-k</sup> | 2.68 ± 0.23 <sup>a-e</sup> | 3.73 ± 0.24 <sup>c-h</sup>   | 0.39 ± 0.03 <sup>h-j</sup> |
| KDML105    | White  | 17.57 ± 0.13 <sup>j,k</sup> | 83.28 ± 0.68 <sup>h-j</sup> | 0.95 ± 0.01 <sup>f,j</sup> | 2.85 ± 0.35 <sup>b-e</sup> | 3.80 ± 0.35 <sup>d-h</sup>   | 0.34 ± 0.04 <sup>f,i</sup> |
| HS         | White  | 17.37 ± 0.19 <sup>j,k</sup> | 82.47 ± 1.06 <sup>g-i</sup> | 1.08 ± 0.01 <sup>g-l</sup> | 3.28 ± 0.13 <sup>c-g</sup> | 4.36 ± 0.12 <sup>h-l</sup>   | 0.33 ± 0.02 <sup>f,i</sup> |
| HD         | White  | 16.98 ± 0.22 <sup>k,l</sup> | 80.90 ± 0.38 <sup>f,g</sup> | 1.02 ± 0.01 <sup>f,k</sup> | 3.72 ± 0.27 <sup>f,h</sup> | 4.73 ± 0.26 <sup>i-m</sup>   | 0.27 ± 0.02 <sup>c-h</sup> |
| PTN1       | White  | 16.67 ± 0.10 <sup>l,m</sup> | 77.68 ± 1.32 <sup>a-d</sup> | 0.92 ± 0.04 <sup>f,i</sup> | 3.28 ± 0.06 <sup>e-g</sup> | 4.20 ± 0.10 <sup>g-k</sup>   | 0.28 ± 0.01 <sup>d-h</sup> |
| M7881      | White  | 16.26 ± 0.08 <sup>m</sup>   | 78.97 ± 0.59 <sup>d-e</sup> | 0.95 ± 0.02 <sup>f,j</sup> | 2.18 ± 0.02 <sup>a</sup>   | 3.13 ± 0.04 <sup>l,a-d</sup> | 0.44 ± 0.01 <sup>i-k</sup> |
| MU2-42     | Purple | 15.03 ± 0.11 <sup>n</sup>   | 79.45 ± 0.05 <sup>d-f</sup> | 1.44 ± 0.03 <sup>m,n</sup> | 3.81 ± 0.16 <sup>g,h</sup> | 5.25 ± 0.13 <sup>m</sup>     | 0.38 ± 0.02 <sup>g,j</sup> |
| SL         | White  | 14.86 ± 0.02 <sup>n,o</sup> | 83.80 ± 1.06 <sup>h-j</sup> | 1.05 ± 0.06 <sup>g-k</sup> | 2.18 ± 0.18 <sup>a</sup>   | 3.23 ± 0.24 <sup>a-e</sup>   | 0.48 ± 0.01 <sup>j,k</sup> |
| 909-10-3   | Purple | 14.67 ± 0.06 <sup>n-p</sup> | 77.57 ± 1.20 <sup>a-d</sup> | 1.15 ± 0.05 <sup>i-m</sup> | 3.62 ± 0.17 <sup>f,h</sup> | 4.77 ± 0.22 <sup>i-m</sup>   | 0.32 ± 0.00 <sup>f,i</sup> |
| JHN        | Purple | 14.66 ± 0.03 <sup>n-p</sup> | 83.40 ± 1.48 <sup>h-j</sup> | 0.90 ± 0.01 <sup>f,i</sup> | 2.47 ± 0.01 <sup>a-c</sup> | 3.36 ± 0.02 <sup>a-f</sup>   | 0.36 ± 0.00 <sup>f,j</sup> |
| HCS        | White  | 14.42 ± 0.03 <sup>o-q</sup> | 84.11 ± 0.21 <sup>i,j</sup> | 0.41 ± 0.02 <sup>a,b</sup> | 2.72 ± 0.04 <sup>a-e</sup> | 3.13 ± 0.02 <sup>a-d</sup>   | 0.15 ± 0.01 <sup>a-c</sup> |
| HLN        | Purple | 14.26 ± 0.02 <sup>p,q</sup> | 78.12 ± 0.01 <sup>b-e</sup> | 1.24 ± 0.01 <sup>i-m</sup> | 3.75 ± 0.25 <sup>f,h</sup> | 4.99 ± 0.25 <sup>l,m</sup>   | 0.33 ± 0.02 <sup>f,i</sup> |
| RB         | Purple | 13.96 ± 0.02 <sup>q</sup>   | 79.44 ± 0.22 <sup>d-f</sup> | 1.37 ± 0.34 <sup>l-n</sup> | 2.53 ± 0.10 <sup>a-d</sup> | 3.90 ± 0.24 <sup>e-h</sup>   | 0.55 ± 0.16 <sup>k</sup>   |
| SYN        | Purple | 13.16 ± 0.14 <sup>r</sup>   | 79.13 ± 1.06 <sup>d-f</sup> | 1.01 ± 0.01 <sup>f,j</sup> | 3.82 ± 0.04 <sup>g,h</sup> | 4.82 ± 0.04 <sup>k-m</sup>   | 0.26 ± 0.00 <sup>c-g</sup> |
| NHN        | White  | 7.83 ± 0.01 <sup>s</sup>    | 84.12 ± 0.23 <sup>i,j</sup> | 1.10 ± 0.34 <sup>h-l</sup> | 3.68 ± 0.15 <sup>f,h</sup> | 4.77 ± 0.19 <sup>i-m</sup>   | 0.30 ± 0.10 <sup>f,h</sup> |
| KH         | Purple | 6.70 ± 0.01 <sup>t</sup>    | 76.32 ± 0.47 <sup>a,b</sup> | 1.32 ± 0.02 <sup>k-n</sup> | 4.12 ± 0.27 <sup>h</sup>   | 5.43 ± 0.28 <sup>m</sup>     | 0.32 ± 0.02 <sup>f,i</sup> |
| MU1-2313   | Purple | 6.75 ± 0.08 <sup>t</sup>    | 76.96 ± 0.16 <sup>a-c</sup> | 1.55 ± 0.01 <sup>n</sup>   | 5.28 ± 0.16 <sup>i</sup>   | 6.83 ± 0.16 <sup>n</sup>     | 0.29 ± 0.01 <sup>e-h</sup> |
| RD6        | White  | 6.23 ± 0.01 <sup>t</sup>    | 84.18 ± 0.26 <sup>i,j</sup> | 0.62 ± 0.01 <sup>e-h</sup> | 2.37 ± 0.04 <sup>a-c</sup> | 2.99 ± 0.03 <sup>a-e</sup>   | 0.35 ± 0.08 <sup>f,i</sup> |

Results are the means ± SE on dry basis and expressed as the percentage of whole grain rice flour. Values with different letters in the same column are significantly different with  $P < 0.05$ . <sup>a</sup>Dietary fibre: soluble dietary fibre (SDF), insoluble dietary fibre (IDF), calculated total dietary fibre (TDF = sum of SDF and IDF).

**Table S4.** Chemical compositions of milled bran samples.

| Varieties  | Colour | Fat                         | Starch                      | <sup>a</sup> Dietary fibre |                             |                             |                            |
|------------|--------|-----------------------------|-----------------------------|----------------------------|-----------------------------|-----------------------------|----------------------------|
|            |        |                             |                             | SDF                        | IDF                         | TDF                         | SDF:IDF                    |
| 66B09      | Brown  | 21.05 ± 0.04 <sup>jk</sup>  | 27.74 ± 1.17 <sup>p</sup>   | 1.30 ± 0.02 <sup>a-c</sup> | 31.93 ± 1.26 <sup>h-j</sup> | 33.23 ± 1.28 <sup>f-j</sup> | 0.04 ± 0.00 <sup>a-c</sup> |
| PK4#20A09  | Brown  | 25.02 ± 0.10 <sup>n</sup>   | 6.78 ± 0.04 <sup>a</sup>    | 2.04 ± 0.17 <sup>c-g</sup> | 33.80 ± 0.16 <sup>k,l</sup> | 35.85 ± 0.00 <sup>l-n</sup> | 0.06 ± 0.01 <sup>b-f</sup> |
| 16F35      | Brown  | 18.41 ± 0.05 <sup>c,d</sup> | 26.74 ± 1.33 <sup>o,p</sup> | 1.71 ± 0.38 <sup>a-e</sup> | 32.20 ± 0.14 <sup>ij</sup>  | 33.91 ± 0.52 <sup>h-k</sup> | 0.05 ± 0.01 <sup>a-d</sup> |
| PK4#117A08 | Brown  | 20.32 ± 0.24 <sup>h-j</sup> | 21.61 ± 0.58 <sup>i-k</sup> | 1.74 ± 0.27 <sup>b-e</sup> | 31.44 ± 0.26 <sup>g-j</sup> | 33.18 ± 0.52 <sup>e-j</sup> | 0.06 ± 0.01 <sup>a-e</sup> |
| PK4#78A03  | Brown  | 19.53 ± 0.02 <sup>f-h</sup> | 18.53 ± 1.79 <sup>d-g</sup> | 3.84 ± 0.19 <sup>k-m</sup> | 27.22 ± 0.54 <sup>b,c</sup> | 31.06 ± 0.72 <sup>b-d</sup> | 0.14 ± 0.00 <sup>k-l</sup> |
| DGR        | Brown  | 20.91 ± 0.57 <sup>jk</sup>  | 15.49 ± 0.47 <sup>c</sup>   | 0.92 ± 0.01 <sup>a,b</sup> | 31.26 ± 0.02 <sup>g-j</sup> | 32.17 ± 0.03 <sup>d-h</sup> | 0.03 ± 0.00 <sup>a</sup>   |
| M9997      | Brown  | 19.61 ± 1.24 <sup>f-i</sup> | 21.47 ± 0.46 <sup>i-k</sup> | 2.47 ± 0.26 <sup>e-i</sup> | 29.04 ± 0.39 <sup>d-f</sup> | 31.50 ± 0.50 <sup>b-f</sup> | 0.09 ± 0.01 <sup>e-h</sup> |
| BMT        | Brown  | 18.99 ± 0.76 <sup>e,f</sup> | 23.79 ± 0.57 <sup>k-n</sup> | 0.78 ± 0.07 <sup>a</sup>   | 26.83 ± 0.54 <sup>b</sup>   | 27.61 ± 0.47 <sup>a</sup>   | 0.03 ± 0.00 <sup>a</sup>   |
| KTH        | Brown  | 22.80 ± 0.01 <sup>m</sup>   | 18.72 ± 0.18 <sup>e-h</sup> | 2.69 ± 0.24 <sup>f-j</sup> | 28.75 ± 0.32 <sup>c-e</sup> | 31.44 ± 0.56 <sup>b-f</sup> | 0.09 ± 0.01 <sup>f-i</sup> |
| RD43       | Brown  | 16.42 ± 0.98 <sup>b</sup>   | 19.38 ± 0.32 <sup>g-i</sup> | 3.16 ± 0.02 <sup>h-k</sup> | 34.17 ± 0.72 <sup>l</sup>   | 37.33 ± 0.70 <sup>n-p</sup> | 0.09 ± 0.00 <sup>f-i</sup> |
| RD15       | Brown  | 19.78 ± 0.08 <sup>f-i</sup> | 16.34 ± 1.33 <sup>c,d</sup> | 4.45 ± 0.29 <sup>l-m</sup> | 25.25 ± 0.18 <sup>a</sup>   | 29.70 ± 0.47 <sup>b</sup>   | 0.18 ± 0.01 <sup>m</sup>   |
| PNL80      | Brown  | 21.97 ± 0.47 <sup>l-m</sup> | 24.39 ± 0.30 <sup>m,n</sup> | 1.51 ± 0.03 <sup>a-d</sup> | 30.27 ± 0.58 <sup>e-g</sup> | 31.79 ± 0.55 <sup>c-g</sup> | 0.05 ± 0.00 <sup>a-d</sup> |
| PK1        | Brown  | 21.20 ± 0.17 <sup>j-l</sup> | 12.80 ± 0.04 <sup>b</sup>   | 3.11 ± 0.12 <sup>h-k</sup> | 29.17 ± 0.05 <sup>d-f</sup> | 32.28 ± 0.08 <sup>d-i</sup> | 0.11 ± 0.00 <sup>h-j</sup> |
| KDML105    | Brown  | 20.83 ± 0.02 <sup>jk</sup>  | 24.01 ± 0.44 <sup>l-n</sup> | 3.59 ± 0.38 <sup>j-l</sup> | 34.36 ± 0.07 <sup>l</sup>   | 37.94 ± 0.31 <sup>o,p</sup> | 0.10 ± 0.01 <sup>h-j</sup> |
| HS         | Brown  | 17.64 ± 0.01 <sup>c</sup>   | 23.97 ± 0.69 <sup>l-n</sup> | 1.59 ± 0.08 <sup>a-e</sup> | 34.16 ± 1.00 <sup>l</sup>   | 35.75 ± 0.92 <sup>k,n</sup> | 0.05 ± 0.00 <sup>a-c</sup> |
| PTN1       | Brown  | 20.98 ± 0.49 <sup>jk</sup>  | 22.17 ± 0.85 <sup>j-m</sup> | 2.47 ± 0.08 <sup>e-i</sup> | 30.74 ± 0.55 <sup>g-i</sup> | 33.22 ± 0.63 <sup>f-j</sup> | 0.08 ± 0.00 <sup>d-h</sup> |
| M7881      | Brown  | 22.48 ± 0.01 <sup>m</sup>   | 22.06 ± 0.55 <sup>j-l</sup> | 3.59 ± 0.02 <sup>j-l</sup> | 27.75 ± 0.32 <sup>b-d</sup> | 31.34 ± 0.34 <sup>b-e</sup> | 0.13 ± 0.00 <sup>j-l</sup> |
| MU2-42     | Purple | 22.50 ± 0.46 <sup>m</sup>   | 16.09 ± 0.80 <sup>c</sup>   | 2.31 ± 0.10 <sup>d-h</sup> | 29.10 ± 0.33 <sup>d-f</sup> | 31.42 ± 0.43 <sup>b-f</sup> | 0.08 ± 0.00 <sup>d-h</sup> |
| SL         | Brown  | 22.01 ± 0.22 <sup>l,m</sup> | 16.25 ± 0.31 <sup>c,d</sup> | 2.71 ± 0.21 <sup>g-j</sup> | 30.85 ± 0.15 <sup>g-j</sup> | 33.56 ± 0.36 <sup>g-j</sup> | 0.09 ± 0.01 <sup>e-h</sup> |
| 909-10-3   | Purple | 21.26 ± 0.11 <sup>k,l</sup> | 16.90 ± 1.73 <sup>c-f</sup> | 3.28 ± 0.15 <sup>i-k</sup> | 32.22 ± 1.32 <sup>i-j</sup> | 35.50 ± 1.47 <sup>k-n</sup> | 0.10 ± 0.00 <sup>g-j</sup> |
| JHN        | Purple | 21.14 ± 0.03 <sup>j-l</sup> | 21.02 ± 0.56 <sup>h-j</sup> | 4.47 ± 0.33 <sup>l-m</sup> | 29.08 ± 0.15 <sup>d-f</sup> | 33.55 ± 0.19 <sup>g-j</sup> | 0.15 ± 0.01 <sup>l,m</sup> |
| HCS        | Brown  | 18.91 ± 0.13 <sup>e,f</sup> | 18.88 ± 0.02 <sup>f-h</sup> | 4.56 ± 0.38 <sup>m</sup>   | 30.47 ± 0.24 <sup>f-h</sup> | 35.03 ± 0.63 <sup>j-m</sup> | 0.15 ± 0.01 <sup>k-m</sup> |
| HLN        | Purple | 20.48 ± 0.01 <sup>i-k</sup> | 25.00 ± 0.11 <sup>n,o</sup> | 2.00 ± 0.04 <sup>c-g</sup> | 28.08 ± 0.24 <sup>b-d</sup> | 30.08 ± 0.19 <sup>b,c</sup> | 0.07 ± 0.00 <sup>c-g</sup> |
| RB         | Purple | 19.24 ± 0.02 <sup>f,g</sup> | 19.65 ± 0.72 <sup>g-i</sup> | 3.88 ± 0.92 <sup>k-m</sup> | 32.34 ± 0.87 <sup>i,k</sup> | 36.23 ± 0.05 <sup>m-n</sup> | 0.12 ± 0.03 <sup>j-k</sup> |
| SYN        | Purple | 22.43 ± 0.37 <sup>m</sup>   | 16.53 ± 0.21 <sup>c-e</sup> | 1.38 ± 0.07 <sup>a-d</sup> | 39.71 ± 0.06 <sup>m</sup>   | 41.09 ± 0.13 <sup>q</sup>   | 0.03 ± 0.00 <sup>a,b</sup> |
| NHN        | Brown  | 20.89 ± 0.01 <sup>jk</sup>  | 16.99 ± 0.51 <sup>c-f</sup> | 1.76 ± 0.24 <sup>b-f</sup> | 29.94 ± 0.79 <sup>e-g</sup> | 31.70 ± 1.03 <sup>c-f</sup> | 0.06 ± 0.01 <sup>a-e</sup> |
| KH         | Purple | 12.98 ± 0.03 <sup>a</sup>   | 35.10 ± 0.16 <sup>q</sup>   | 3.73 ± 0.42 <sup>k-m</sup> | 34.88 ± 0.08 <sup>l</sup>   | 38.61 ± 0.34 <sup>p</sup>   | 0.11 ± 0.01 <sup>h-j</sup> |
| MU1-2313   | Purple | 15.75 ± 0.01 <sup>b</sup>   | 22.45 ± 0.78 <sup>j-m</sup> | 3.17 ± 0.18 <sup>h-k</sup> | 39.30 ± 0.25 <sup>m</sup>   | 42.47 ± 0.43 <sup>q</sup>   | 0.08 ± 0.00 <sup>d-h</sup> |
| RD6        | Brown  | 19.90 ± 0.17 <sup>g-i</sup> | 17.81 ± 1.59 <sup>c-g</sup> | 3.79 ± 0.97 <sup>k-m</sup> | 30.32 ± 0.25 <sup>f,g</sup> | 34.11 ± 1.22 <sup>i-l</sup> | 0.13 ± 0.03 <sup>i-l</sup> |

Results are the means ± SE on dry basis and expressed as the percentage of rice bran powder. Values with different letters in the same column are significantly different with  $P < 0.05$ . <sup>a</sup>Dietary fibre: soluble dietary fibre (SDF), insoluble dietary fibre (IDF), calculated total dietary fibre (TDF = sum of SDF and IDF).

**Table S5.** Pearson's correlation matrix: correlation coefficients of amylose content, gelatinization temperature, textural properties, and dietary fibre profiles.

|                | AC             | GT    | HRD            | ADH            | SPR           | COH            | GUM            | CHEW           | SDFWGR        | IDFWGR | SDF:IDF |
|----------------|----------------|-------|----------------|----------------|---------------|----------------|----------------|----------------|---------------|--------|---------|
| <b>AC</b>      | 1              |       |                |                |               |                |                |                |               |        |         |
| <b>GT</b>      | -0.23          | 1     |                |                |               |                |                |                |               |        |         |
| <b>HRD</b>     | <b>0.80**</b>  | -0.05 | 1              |                |               |                |                |                |               |        |         |
| <b>ADH</b>     | <b>-0.75**</b> | 0.21  | <b>-0.66**</b> | 1              |               |                |                |                |               |        |         |
| <b>SPR</b>     | <b>0.76**</b>  | -0.25 | <b>0.54**</b>  | <b>-0.61**</b> | 1             |                |                |                |               |        |         |
| <b>COH</b>     | <b>0.78**</b>  | -0.25 | <b>0.66**</b>  | <b>-0.61**</b> | <b>0.86**</b> | 1              |                |                |               |        |         |
| <b>GUM</b>     | <b>0.86**</b>  | -0.12 | <b>0.96**</b>  | <b>-0.69**</b> | <b>0.71**</b> | <b>0.84**</b>  | 1              |                |               |        |         |
| <b>CHEW</b>    | <b>0.89**</b>  | -0.15 | <b>0.87**</b>  | <b>-0.69**</b> | <b>0.86**</b> | <b>0.91**</b>  | <b>0.96**</b>  | 1              |               |        |         |
| <b>SDFWGR</b>  | <b>-0.63**</b> | -0.02 | <b>-0.70**</b> | <b>0.45*</b>   | -0.35         | <b>-0.58**</b> | <b>-0.72**</b> | <b>-0.62**</b> | 1             |        |         |
| <b>IDFWGR</b>  | -0.25          | 0.25  | 0.05           | 0.29           | -0.28         | -0.22          | -0.07          | -0.15          | 0.25          | 1      |         |
| <b>SDF:IDF</b> | <b>-0.51**</b> | -0.16 | <b>-0.74**</b> | 0.31           | -0.22         | <b>-0.45*</b>  | <b>-0.69**</b> | <b>-0.55**</b> | <b>0.87**</b> | -0.24  | 1       |

\* Correlation is significant at the 0.05 level; \*\* Correlation is significant at the 0.01 level.

AC = amylose content; GT = gelatinization temperature; HRD = hardness; ADH = adhesiveness; SPR = springiness; COH = cohesiveness; GUM = gumminess; CHEW = chewiness; SDFWGR = SDF in whole grain rice; IDFWGR = IDF in whole grain rice; SDF:IDF = SDF to IDF ratio of whole grain rice.

**Table S6.** Texture profile analysis of cooked whole grain rice samples.

| Varieties  | Hardness<br>(HRD)<br>(N)    | Adhesiveness<br>(ADH)<br>(mN.sec) | Springiness<br>(SPR)<br>(Sec/Sec) | Cohesiveness<br>(COH)<br>(N.sec/N.sec) | Gumminess<br>(GUM)<br>(N)   | Chewiness<br>(CHEW)<br>(N)  |
|------------|-----------------------------|-----------------------------------|-----------------------------------|----------------------------------------|-----------------------------|-----------------------------|
| 66B09      | 30.50 ± 1.03 <sup>c,d</sup> | 12.62 ± 1.58 <sup>a,b</sup>       | 0.65 ± 0.04 <sup>c-g</sup>        | 0.47 ± 0.00 <sup>b,c</sup>             | 13.27 ± 0.84 <sup>b,d</sup> | 8.67 ± 0.96 <sup>d,e</sup>  |
| PK4#20A09  | 36.67 ± 0.17 <sup>a</sup>   | 10.62 ± 1.42 <sup>a</sup>         | 0.66 ± 0.01 <sup>c-f</sup>        | 0.44 ± 0.04 <sup>c-f</sup>             | 16.00 ± 1.75 <sup>a</sup>   | 10.61 ± 1.31 <sup>a-c</sup> |
| 16F35      | 30.41 ± 0.95 <sup>c,d</sup> | 14.34 ± 0.27 <sup>a-c</sup>       | 0.70 ± 0.01 <sup>b,c</sup>        | 0.49 ± 0.01 <sup>b</sup>               | 14.93 ± 0.13 <sup>a,b</sup> | 10.62 ± 0.44 <sup>a,b</sup> |
| MU2-00005  | 27.62 ± 0.16 <sup>e,f</sup> | 12.93 ± 1.46 <sup>a,b</sup>       | 0.70 ± 0.04 <sup>b,c</sup>        | 0.50 ± 0.01 <sup>a,b</sup>             | 13.91 ± 0.33 <sup>b,c</sup> | 9.96 ± 0.70 <sup>a-d</sup>  |
| PK4#117A08 | 34.44 ± 0.16 <sup>b</sup>   | 13.41 ± 2.25 <sup>a,b</sup>       | 0.67 ± 0.01 <sup>b-d</sup>        | 0.46 ± 0.01 <sup>b-d</sup>             | 15.78 ± 0.21 <sup>a</sup>   | 10.66 ± 0.07 <sup>a,b</sup> |
| PK4#78A03  | 29.04 ± 0.68 <sup>d,e</sup> | 11.81 ± 2.79 <sup>a</sup>         | 0.70 ± 0.01 <sup>b,c</sup>        | 0.39 ± 0.01 <sup>f-l</sup>             | 11.42 ± 0.69 <sup>e-g</sup> | 8.01 ± 0.64 <sup>e,f</sup>  |
| DGR        | 25.00 ± 0.42 <sup>g-i</sup> | 19.30 ± 4.09 <sup>a-e</sup>       | 0.74 ± 0.01 <sup>b</sup>          | 0.47 ± 0.01 <sup>b-d</sup>             | 12.70 ± 0.54 <sup>d-f</sup> | 9.61 ± 0.26 <sup>b,c</sup>  |
| M9997      | 24.02 ± 0.18 <sup>h-j</sup> | 24.00 ± 7.38 <sup>a-e</sup>       | 0.89 ± 0.02 <sup>a</sup>          | 0.53 ± 0.00 <sup>a</sup>               | 12.84 ± 0.25 <sup>c-e</sup> | 11.52 ± 0.08 <sup>a</sup>   |
| BMT        | 24.59 ± 1.01 <sup>g-i</sup> | 12.22 ± 1.50 <sup>a</sup>         | 0.67 ± 0.04 <sup>b-e</sup>        | 0.41 ± 0.01 <sup>e-i</sup>             | 10.07 ± 0.28 <sup>g,h</sup> | 6.74 ± 0.55 <sup>f,g</sup>  |
| KTH        | 31.59 ± 0.39 <sup>c</sup>   | 47.64 ± 2.96 <sup>f-j</sup>       | 0.67 ± 0.03 <sup>b-d</sup>        | 0.46 ± 0.00 <sup>b-d</sup>             | 14.63 ± 0.22 <sup>a,b</sup> | 9.86 ± 0.56 <sup>b-d</sup>  |
| RD43       | 25.77 ± 0.38 <sup>f-h</sup> | 19.65 ± 0.45 <sup>a-e</sup>       | 0.58 ± 0.04 <sup>g-i</sup>        | 0.44 ± 0.02 <sup>c-e</sup>             | 11.39 ± 0.35 <sup>e-g</sup> | 6.58 ± 0.67 <sup>f,g</sup>  |
| RD15       | 26.23 ± 0.08 <sup>g</sup>   | 21.70 ± 3.70 <sup>a-e</sup>       | 0.58 ± 0.02 <sup>g-i</sup>        | 0.42 ± 0.01 <sup>d-g</sup>             | 11.08 ± 0.36 <sup>f,g</sup> | 6.43 ± 0.48 <sup>f,g</sup>  |
| PNL80      | 22.27 ± 0.32 <sup>i,k</sup> | 56.58 ± 0.11 <sup>h-k</sup>       | 0.64 ± 0.03 <sup>c-g</sup>        | 0.41 ± 0.02 <sup>e-i</sup>             | 9.20 ± 0.46 <sup>h,i</sup>  | 6.00 ± 0.50 <sup>g,h</sup>  |
| PK1        | 18.70 ± 0.05 <sup>m,n</sup> | 17.91 ± 1.62 <sup>a-d</sup>       | 0.64 ± 0.06 <sup>c-g</sup>        | 0.38 ± 0.01 <sup>g-k</sup>             | 7.19 ± 0.23 <sup>j,k</sup>  | 4.62 ± 0.62 <sup>h-k</sup>  |
| KDML105    | 20.63 ± 0.16 <sup>k,l</sup> | 28.10 ± 4.79 <sup>a-f</sup>       | 0.58 ± 0.01 <sup>e-h</sup>        | 0.39 ± 0.01 <sup>g-j</sup>             | 8.12 ± 0.21 <sup>i-k</sup>  | 4.75 ± 0.04 <sup>h-j</sup>  |
| HS         | 19.39 ± 0.87 <sup>l-n</sup> | 47.13 ± 1.39 <sup>f-j</sup>       | 0.53 ± 0.01 <sup>h-k</sup>        | 0.36 ± 0.01 <sup>j-l</sup>             | 7.06 ± 0.56 <sup>j,k</sup>  | 3.78 ± 0.37 <sup>i-l</sup>  |
| HD         | 23.11 ± 1.25 <sup>i,j</sup> | 77.14 ± 11.22 <sup>k</sup>        | 0.58 ± 0.03 <sup>g-i</sup>        | 0.39 ± 0.01 <sup>g-j</sup>             | 9.19 ± 0.74 <sup>h,i</sup>  | 5.28 ± 0.70 <sup>g-i</sup>  |
| PTN1       | 18.39 ± 0.04 <sup>n</sup>   | 62.22 ± 9.35 <sup>j,k</sup>       | 0.55 ± 0.02 <sup>h-j</sup>        | 0.37 ± 0.01 <sup>i-k</sup>             | 6.84 ± 0.10 <sup>k-m</sup>  | 3.83 ± 0.21 <sup>i-l</sup>  |
| M7881      | 14.19 ± 0.60 <sup>o,p</sup> | 35.57 ± 7.97 <sup>c-h</sup>       | 0.58 ± 0.01 <sup>f-i</sup>        | 0.38 ± 0.00 <sup>h-k</sup>             | 5.35 ± 0.17 <sup>l-n</sup>  | 3.14 ± 0.14 <sup>k-m</sup>  |
| MU2-42     | 16.05 ± 0.04 <sup>o</sup>   | 55.51 ± 12.00 <sup>g-k</sup>      | 0.48 ± 0.01 <sup>j,k</sup>        | 0.32 ± 0.01 <sup>l,m</sup>             | 5.21 ± 0.11 <sup>m,n</sup>  | 2.48 ± 0.02 <sup>l,m</sup>  |
| SL         | 22.14 ± 0.62 <sup>j,k</sup> | 39.38 ± 6.78 <sup>d-i</sup>       | 0.54 ± 0.04 <sup>h-k</sup>        | 0.39 ± 0.02 <sup>g-j</sup>             | 8.66 ± 0.20 <sup>h-j</sup>  | 4.66 ± 0.45 <sup>h-k</sup>  |
| 909-10-3   | 20.98 ± 1.19 <sup>k,l</sup> | 34.15 ± 7.68 <sup>b-g</sup>       | 0.49 ± 0.03 <sup>i,k</sup>        | 0.31 ± 0.02 <sup>m</sup>               | 6.64 ± 0.73 <sup>k-m</sup>  | 3.26 ± 0.57 <sup>j-m</sup>  |
| JHN        | 20.58 ± 0.45 <sup>k,m</sup> | 60.24 ± 7.99 <sup>j,k</sup>       | 0.55 ± 0.02 <sup>h-j</sup>        | 0.36 ± 0.01 <sup>j-l</sup>             | 7.49 ± 0.35 <sup>j,k</sup>  | 4.14 ± 0.31 <sup>i-k</sup>  |
| HCS        | 19.09 ± 1.00 <sup>l-n</sup> | 54.37 ± 25.53 <sup>g-j</sup>      | 0.50 ± 0.02 <sup>i-k</sup>        | 0.36 ± 0.02 <sup>j-l</sup>             | 7.00 ± 0.68 <sup>j-l</sup>  | 3.52 ± 0.50 <sup>j-m</sup>  |
| HLN        | 20.77 ± 1.07 <sup>k,l</sup> | 37.08 ± 7.22 <sup>d-h</sup>       | 0.53 ± 0.03 <sup>h-k</sup>        | 0.34 ± 0.01 <sup>k-m</sup>             | 7.19 ± 0.60 <sup>j,k</sup>  | 3.85 ± 0.52 <sup>i-l</sup>  |
| RB         | 13.04 ± 0.18 <sup>p</sup>   | 46.24 ± 7.98 <sup>f-j</sup>       | 0.46 ± 0.03 <sup>k</sup>          | 0.34 ± 0.02 <sup>k-m</sup>             | 4.47 ± 0.38 <sup>n</sup>    | 2.09 ± 0.30 <sup>m</sup>    |
| SYN        | 23.53 ± 0.94 <sup>i,j</sup> | 40.22 ± 1.23 <sup>e-i</sup>       | 0.60 ± 0.00 <sup>d-h</sup>        | 0.41 ± 0.01 <sup>e-h</sup>             | 9.77 ± 0.73 <sup>g-i</sup>  | 5.95 ± 0.40 <sup>g,h</sup>  |

Results are the means ± SE. Values with different letters in the same column are significantly different with  $P < 0.05$ . The texture analyzer instrumental parameters including hardness (HRD), adhesiveness (ADH), springiness (SPR), cohesiveness (COH), gumminess (GUM), and chewiness (CHEW) were derived from Texture analyzer (TA-XT plus, Stable Micro System, Godalming, UK) with two-cycle compression test.

**Table S7.** Genotype of rice samples: the GT/TT polymorphism at the 5' splice site of the first intron of the waxy (*Wx*) gene and two predominant *Wx* alleles.

| Varieties  | <i>Wx</i> Splice site | <i>Wx</i> alleles     |
|------------|-----------------------|-----------------------|
| 66B09      | GT                    | <i>Wx<sup>a</sup></i> |
| PK4#20A09  | GT                    | <i>Wx<sup>a</sup></i> |
| 16F35      | GT                    | <i>Wx<sup>a</sup></i> |
| MU2-00005  | GT                    | <i>Wx<sup>a</sup></i> |
| PK4#117A08 | GT                    | <i>Wx<sup>a</sup></i> |
| PK4#78A03  | GT                    | <i>Wx<sup>a</sup></i> |
| DGR        | GT                    | <i>Wx<sup>a</sup></i> |
| M9997      | GT                    | <i>Wx<sup>a</sup></i> |
| BMT        | GT                    | <i>Wx<sup>a</sup></i> |
| KTH        | GT                    | <i>Wx<sup>a</sup></i> |
| RD43       | TT                    | <i>Wx<sup>b</sup></i> |
| RD15       | TT                    | <i>Wx<sup>b</sup></i> |
| PNL80      | TT                    | <i>Wx<sup>b</sup></i> |
| PK1        | TT                    | <i>Wx<sup>b</sup></i> |
| KDML105    | TT                    | <i>Wx<sup>b</sup></i> |
| HS         | TT                    | <i>Wx<sup>b</sup></i> |
| HD         | TT                    | <i>Wx<sup>b</sup></i> |
| PTN1       | TT                    | <i>Wx<sup>b</sup></i> |
| M7881      | TT                    | <i>Wx<sup>b</sup></i> |
| MU2-42     | TT                    | <i>Wx<sup>b</sup></i> |
| SL         | TT                    | <i>Wx<sup>b</sup></i> |
| 909-10-3   | TT                    | <i>Wx<sup>b</sup></i> |
| JHN        | TT                    | <i>Wx<sup>b</sup></i> |
| HCS        | TT                    | <i>Wx<sup>b</sup></i> |
| HLN        | TT                    | <i>Wx<sup>b</sup></i> |
| RB         | TT                    | <i>Wx<sup>b</sup></i> |
| SYN        | TT                    | <i>Wx<sup>b</sup></i> |

**Table S8.** Range of basic nutrient compositions of whole grain rice, milled rice, and rice bran.

| <b>Nutrient</b> | <b>Whole grain rice</b> | <b>Milled rice</b> | <b>Rice bran</b> |
|-----------------|-------------------------|--------------------|------------------|
| Starch          | 75.8-84.6               | 86.9-92.9          | 6.8-35.1         |
| Lipids          | 2.9-3.4                 | 0.4-0.9            | 13.0-25.0        |
| Protein         | 7.3-8.8                 | 7.6-9.0            | 16.8-20.1        |
| Dietary fibre   | 2.9-6.8                 | 1.2-2.6            | 27.6.-42.5       |
| Ash             | 1.4-1.6                 | 0.4-0.5            | 9.7-11.4         |

Results are the percentage of whole grain rice flour or milled rice flour or rice bran powder



**Table S9.** Comparison of the  $\beta$ -glucan and pectin content in whole grain rice and rice bran.

| Varieties | $\beta$ -glucan                |                                | Pectin                         |                                |
|-----------|--------------------------------|--------------------------------|--------------------------------|--------------------------------|
|           | <sup>a</sup> Grain             | <sup>b</sup> Bran              | <sup>a</sup> Grain             | <sup>b</sup> Bran              |
| PK4#20A09 | 0.03 $\pm$ 0.00 <sup>a</sup>   | 0.24 $\pm$ 0.01 <sup>a-d</sup> | 0.07 $\pm$ 0.01 <sup>a</sup>   | 0.26 $\pm$ 0.01 <sup>a</sup>   |
| PK4#78A03 | 0.03 $\pm$ 0.00 <sup>a</sup>   | 0.25 $\pm$ 0.00 <sup>b-d</sup> | 0.10 $\pm$ 0.01 <sup>a,b</sup> | 0.27 $\pm$ 0.01 <sup>a</sup>   |
| RD43      | 0.03 $\pm$ 0.00 <sup>a</sup>   | 0.24 $\pm$ 0.01 <sup>a-d</sup> | 0.16 $\pm$ 0.03 <sup>b-d</sup> | 0.31 $\pm$ 0.01 <sup>a</sup>   |
| RD15      | 0.06 $\pm$ 0.02 <sup>a-c</sup> | 0.29 $\pm$ 0.00 <sup>e</sup>   | 0.25 $\pm$ 0.00 <sup>e</sup>   | 0.29 $\pm$ 0.02 <sup>a</sup>   |
| PK1       | 0.07 $\pm$ 0.01 <sup>b-c</sup> | 0.22 $\pm$ 0.00 <sup>a-c</sup> | 0.11 $\pm$ 0.00 <sup>a,b</sup> | 0.30 $\pm$ 0.04 <sup>a</sup>   |
| M7881     | 0.08 $\pm$ 0.00 <sup>b,c</sup> | 0.21 $\pm$ 0.00 <sup>a</sup>   | 0.14 $\pm$ 0.04 <sup>b,c</sup> | 0.29 $\pm$ 0.06 <sup>a</sup>   |
| SLK       | 0.11 $\pm$ 0.00 <sup>d</sup>   | 0.26 $\pm$ 0.00 <sup>d,e</sup> | 0.16 $\pm$ 0.01 <sup>b-d</sup> | 0.33 $\pm$ 0.04 <sup>a,b</sup> |
| JHN       | 0.11 $\pm$ 0.00 <sup>d</sup>   | 0.26 $\pm$ 0.02 <sup>c-e</sup> | 0.27 $\pm$ 0.01 <sup>e</sup>   | 0.32 $\pm$ 0.01 <sup>a,b</sup> |
| HCS       | 0.09 $\pm$ 0.01 <sup>c,d</sup> | 0.23 $\pm$ 0.01 <sup>a-c</sup> | 0.16 $\pm$ 0.01 <sup>b-d</sup> | 0.27 $\pm$ 0.01 <sup>a</sup>   |
| RB        | 0.14 $\pm$ 0.02 <sup>e</sup>   | 0.40 $\pm$ 0.03 <sup>f</sup>   | 0.25 $\pm$ 0.04 <sup>e</sup>   | 0.42 $\pm$ 0.02 <sup>b</sup>   |

Results are the means  $\pm$  SE on dry basis. Values with different letters in the same column are significantly different with  $P < 0.05$ .  $\beta$ -glucan and pectin content are presented as the percentage of <sup>a</sup>whole grain rice flour or <sup>b</sup>milled bran powder.
